1 **Characteristics and data reporting of rare disease clinical trials:**

2 **Getting better but still room for improvement**

3

4 Nina K. Mair<sup>1</sup>, Jürgen Gottowik<sup>1</sup>, Raul Rodriguez-Esteban<sup>1</sup> and Timothy J. Seabrook<sup>1</sup>

5

6 <sup>1</sup>Roche Pharmaceutical Research and Early Development, F. Hoffmann-La Roche Ltd., Basel,

7 Switzerland.

8

9

10 Correspondence:

11 Nina K. Mair, University of Zurich, Winterthurerstrasse 190, 8057 Zürich, Telephone: +41 76 21

12 07073, E-Mail: [mair.nina@virology.uzh.ch](mailto:mair.nina@virology.uzh.ch).

13

14

15 Word counts for text and abstract: Text, 5421 words; Abstract, 349 words

16 Figure/table count: 3 figures; 3 tables

17 Reference count: 39 references

18

19

20

21

22

23

24

25

26

27 **ABSTRACT**

28 **Background**

29 It is estimated that there are more than 7,000 rare diseases (RDs) worldwide, impacting the  
30 lives of approximately 400 million people and only 5% have an approved therapy. Facing  
31 special challenges, including patient scarceness, incomplete knowledge of the natural history  
32 and only few specialized clinical sites, clinical trials (CT) are limited, making the data from  
33 trials critical for research and clinical care. Despite the introduction of the U.S. Food and  
34 Drug Administration Amendment Act (FDAAA) in 2007 requiring certain CTs to post results  
35 on the registry ClinicalTrials.gov within 12 months following completion, compliance has  
36 been reportedly poor. Here, we describe general characteristics of RD CTs, identify trends,  
37 and evaluate result reporting practices under the FDAAA aiming to draw awareness to the  
38 problem of non-compliance.

39 **Methods**

40 CTs conducted between 2008 and 2015 were extracted from the public U.S. trial registry  
41 ClinicalTrials.gov using the text mining software I2E (Linguamatics). Disease names were  
42 matched with rare disease names from the Orphanet Rare Disease Ontology (ORDO, v2.5,  
43 Orphanet). Statistical analyses and data visualization were performed using GraphPad Prism  
44 7 and R (v3.5). The Student's t-test was employed to calculate significance using p-value cut-  
45 offs of <0.05 or <0.001.

46 **Results**

47 We analyzed 1,056 RD CTs of which 55.7% were phase 2, 7.7% phase 2/3 and 36.7% phase  
48 3 trials. The studies were mostly one- and two-armed experimental CTs with the majority  
49 (60.2%) being funded by industry. Cystic fibrosis and sickle cell disease represented the most  
50 frequently investigated diseases (25.0% and 16.5%). Industry-led phase 2 RD CTs were  
51 significantly ( $p < 0.0001$ ) shorter than their equivalent led by academia/non-profit (22 vs. 33

52 months). Screening CTs completed before the end of 2015, we found that of the 725 analyzed  
53 studies, 55.2% predominantly phase 2 CTs, did not report results. Taking their potential  
54 applicability to the FDAAA into account, 25.2% industry-funded and 28.0% academia/non-  
55 profit-funded trials failed to disclose results on ClinicalTrial.gov.

## 56 **Conclusion**

57 RD CTs tend to be comparatively small, industry-funded studies focusing on genetic and  
58 neurologic conditions. Sponsor-related differences in study design, duration, and enrollment  
59 were observed. There are still substantial shortcomings when it comes to result publication.

60 **Key words:** ClinicalTrials.gov, rare disease, result publication, FDAAA

61

## 62 **INTRODUCTION**

63 In the U.S., rare diseases (RDs) are defined as affecting less than a total of 200,000 people, in  
64 Europe the definition is based on a frequency of 1 in 2,000 or fewer people. It is estimated that  
65 there are more than 7,000 RDs which together impact the lives of approximately 400 million  
66 people worldwide<sup>1</sup>, with only half of them being genetically characterized<sup>2</sup>. The medical need  
67 is still high as only 5% of RDs currently have an approved therapy<sup>3</sup>. In order to foster research  
68 in these largely underserved orphan diseases, the U.S. Food and Drug Administration (FDA)  
69 introduced the Orphan Drug Act in 1983 providing various incentives for the development of  
70 treatments<sup>4</sup>. Despite this initiative being very successful with 745 FDA approvals (428 in the  
71 last ten years), 99.9% of which filed by industry, more therapies are needed<sup>5</sup>.

72 Clinical research in RDs faces challenges which usually have less impact on clinical trials  
73 (CTs) conducted in common diseases. These include patient scarceness, incomplete knowledge  
74 of the natural history and limited clinical sites able to treat these patients. This often results in  
75 a limited number of CTs in each RD, making the data from trials critical for research and  
76 clinical care. Despite the introduction of the U.S. Food and Drug Administration Amendment

77 Act (FDAAA) in 2007<sup>6</sup> requiring CTs matching specific criteria to post results on  
78 ClinicalTrials.gov within 12 months following trial completion, compliance has been  
79 reportedly poor, which may directly impact patient care and therapy development <sup>7-9</sup>. The  
80 purpose of this report is to describe the general landscape of rare disease clinical trials (RD  
81 CTs), identify trends, and also evaluate result reporting practices after the introduction of the  
82 FDAAA with the goal of drawing awareness to the problem of non-compliance.

83

## 84 **METHODS**

### 85 **Data sources**

86 Trial records with a clinical trial identifier (NCT number), a brief/official title and a study start  
87 and end date between 2008 and 2015 were extracted from the publicly accessible U.S. trial  
88 registry ClinicalTrials.gov using the text mining software I2E from Linguamatics. The glossary  
89 of common site terms, which can be found on ClinicalTrials.gov<sup>10</sup>, was used to determine if a  
90 CT was experimental, interventional, used an active comparator and other terms used in this  
91 paper.

92

### 93 **Data set development**

94 In order to distinguish RD CTs from common disease CTs, ClinicalTrials.gov condition  
95 specifications were matched with RD names from the Orphanet Rare Disease Ontology  
96 (ORDO) version 2.5 provided by Orphanet. Trials studying (rare) malignancies and  
97 communicable diseases were excluded, as well as all studies in phases 1, 1/2 and 4, and those  
98 without a study phase. Oncology CTs were excluded as rare oncology diseases are often  
99 included amongst other more common cancers as part of basket trials and thus did not reflect  
100 a RD CT. Infectious disease CTs included many HIV and hepatitis studies, which are not rare

101 in much of the world and thus were excluded. Phase 1 studies comprise healthy subjects, not  
102 reflecting RD patient populations.

103 Studies starting before 2008 were excluded, due to the introduction of the FDAAA in 2007, as  
104 well as studies with a study status other than “completed”. Finally, studies involving incorrectly  
105 entered information into the “condition” field of the registry or studies that involved poisoning  
106 or envenomations were manually removed. To examine result reporting, we generated a second  
107 data set including studies with an indicated completion date beyond 2015, to provide the  
108 responsible party with more than two years for the study results to be analyzed and entered on  
109 ClinicalTrials.gov at the time of our analysis.

110 To determine study location, all study locations in the contacts and locations section of each  
111 study’s ClinicalTrials.gov record were examined and counted. A site was counted every time  
112 it was mentioned by a CT. Therefore, a single study site was included multiple times if it hosted  
113 more than one CT during the time period examined.

114 To determine the sponsor, we extracted the responsible party as indicated on ClinicalTrials.gov  
115 and manually allocated CTs to “industry” or “academia/non-profit” according to the source of  
116 funding. “Industry” referred almost exclusively to registered for-profit companies, while  
117 publicly funded entities, such as universities, foundations, associations and non-profit  
118 organizations were allocated to “academia/non-profit”. One study in the final data set of 1,056  
119 studies could not be unambiguously allocated to a sponsor and was therefore excluded from  
120 the respective analyses.

121

## 122 **Statistical analyses and data visualization**

123 Statistical analyses and data visualization were performed using GraphPad Prism 7. Microsoft  
124 Excel was used for statistical calculations to analyze enrollment due to cell number limitations

125 in GraphPad Prism 7. For calculations of significance, Student's t-test was employed using p-  
126 value cut-offs of <0.05 or <0.001 to demonstrate significant results.

127

## 128 **RESULTS**

### 129 **Design characteristics of rare disease clinical trials (RD CTs)**

130 An overview of the workflow resulting in the final data set comprising 1,056 RD CTs is shown  
131 in **Fig 1**. Examining the general characteristics of the studies (**Table 1**), we found that trials  
132 were equally distributed across all years from 2008 to 2015 ( $12.5 \pm 1.8\%$  trials per year). More  
133 than half of the studies analyzed were in phase 2 (55.7%), followed phase 3 (36.7%) and 2/3  
134 (7.7%). While phase 2 and phase 3 CTs showed a similar proportion of experimental (77.9%  
135 and 75.5%) and active comparator (17.3% and 21.7%) study arm types, phase 2/3 CTs tended  
136 to include more active comparator studies (29.6%) with 67.9% of the studies being  
137 experimental. Here, 49.4% of all CTs are two-armed studies, followed by one-armed studies  
138 (31.7%). A total of 60.2% CTs were industry-funded and 39.8% were academia/non-profit-  
139 funded. While phase 2 and phase 3 CTs were predominantly industry-sponsored, with 53.9%  
140 and 74.1%, respectively, academia/non-profit prevailed in phase 2/3 CTs (60.5%).

141

| <b>Study Start Year</b> | <b>n (%)</b>      | <b>Study Phases</b>   | <b>n (%)</b>      |
|-------------------------|-------------------|-----------------------|-------------------|
| 2008                    | 149 (14.1)        | Phase 2               | 588 (55.7)        |
| 2009                    | 138 (13.1)        | Phase 2/3             | 81 (7.7)          |
| 2010                    | 137 (13.0)        | Phase 3               | 387 (36.7)        |
| 2011                    | 146 (13.8)        | <b>Number of Arms</b> | <b>n (%)</b>      |
| 2012                    | 144 (13.6)        | <b>Phase 2</b>        | <b>588 (55.7)</b> |
| 2013                    | 130 (12.3)        | 1                     | 200 (18.9)        |
| 2014                    | 120 (11.4)        | 2                     | 256 (24.2)        |
| 2015                    | 92 (8.7)          | 3                     | 76 (7.2)          |
| <b>Study Arm Type</b>   | <b>n (%)</b>      | 4                     | 39 (3.7)          |
| <b>Phase 2</b>          | <b>588 (55.7)</b> | 5                     | 10 (0.9)          |

|                        |                   |                  |                   |
|------------------------|-------------------|------------------|-------------------|
| Active Comparator      | 102 (9.7)         | 6                | 3 (0.3)           |
| Experimental           | 458 (43.4)        | 8                | 1 (0.1)           |
| No Intervention        | 1 (0.1)           | 10               | 1 (0.1)           |
| Other                  | 14 (1.3)          | 22               | 1 (0.1)           |
| N/A                    | 13 (1.2)          | N/A              | 1 (0.1)           |
| <b>Phase 2/Phase 3</b> | <b>81 (7.7)</b>   | <b>Phase 2/3</b> | <b>81 (7.7)</b>   |
| Active Comparator      | 24 (2.3)          | 1                | 19 (1.8)          |
| Experimental           | 55 (5.2)          | 2                | 50 (4.7)          |
| Other                  | 1 (0.1)           | 3                | 7 (0.7)           |
| Placebo Comparator     | 1 (0.1)           | 4                | 5 (0.5)           |
| <b>Phase 3</b>         | <b>387 (36.6)</b> | <b>Phase 3</b>   | <b>387 (36.7)</b> |
| Active Comparator      | 84 (8.0)          | 1                | 116 (11.0)        |
| Experimental           | 292 (27.7)        | 2                | 215 (20.4)        |
| Other                  | 8 (0.8)           | 3                | 37 (3.5)          |
| Placebo Comparator     | 1 (0.1)           | 4                | 12 (1.1)          |
| N/A                    | 2 (0.2)           | 5                | 2 (0.2)           |
|                        |                   | 6                | 4 (0.4)           |
|                        |                   | 7                | 1 (0.1)           |

142

143 *Table 1. Characteristics of the 1056 completed Phase 2, 2/3 and 3 CTs registered at*  
 144 *ClinicalTrials.gov. For each study arm type, the overall distribution of the evaluated CTs is*  
 145 *highlighted in bold with the respective proportion of each study arm type listed below. The same*  
 146 *applies to the table depicting the number of study arms.*

#### 147 **Disease categories**

148 To generate a more comprehensive view of the RD CT landscape, we analyzed the disease  
 149 areas addressed in this data set. By leveraging the Orphanet Diseases 2.5 ontology, we were  
 150 able to map all but one trial to specific conditions. Each CT could be allocated to up to seven  
 151 diseases and each disease could be assigned to more than one category. The ten most common  
 152 rare disease categories were genetic disease (19.4%), neurologic disease (12.3%), respiratory  
 153 disease (8.2%), eye disease (6.4%), systemic or rheumatologic disease (5.9%), hematologic

154 disease (5.4%), renal disease (5.0%), infertility (4.7%), skin disease (4.4%) and developmental  
155 defect (4.1%). These accounted for a total of 75.8% of all diseases. In fact, 92.9% (n=971) of  
156 the RD CTs were mapped to at least one of the top 10 categories. In detail, 35.8% (n=378) of  
157 the studies were mapped to one top-ten category, 21.8% (n=230) were mapped to two and  
158 20.5% (n=216) to three.

159 Furthermore, we found that the top ten diseases account for 86.2% of all CTs with cystic  
160 fibrosis (CF) accounting for 25.0%, followed by sickle cell disease (16.5%), hemophilia  
161 (8.7%), Fabry disease (6.3%), fragile X syndrome (6.1%), Huntington disease (5.7%),  
162 sarcoidosis (4.9%), systemic sclerosis (4.9%), Friedreich Ataxia (4.3%) and muscular  
163 dystrophies (primarily Duchenne, but also Becker and oculopharyngeal muscular dystrophy)  
164 (3.9%). To determine whether the ten most investigated diseases also reflect the leading  
165 diseases in each category, the various conditions were analyzed based on their by the sponsor  
166 designated category. While, CF dominates the “rare” categories genetic diseases (15.7%),  
167 respiratory diseases (37.1%) and infertility (64.2%), sickle cell disease was found first in the  
168 categories systemic or rheumatologic disease (16.9%) and renal disease (20.0%). The three  
169 most researched conditions in other areas are hemophilia (29.3%) in hematologic disease,  
170 alopecia (24.2%) in skin disease, and amyotrophic lateral sclerosis (12.1%) in neurologic  
171 disease.

172 Compared to the entire corpus of 2,257,370 CTs entered in ClinicalTrials.gov, most studies in  
173 ClinicalTrials.gov investigated cancers and other neoplasms (13.8%), followed by general  
174 pathology (10.5%), nervous system diseases (9.2%), digestive system diseases (6.7%), heart  
175 and blood diseases (6.6%) and behaviors and mental disorders (6.5%). Thus, RD CTs represent  
176 a different spectrum of disease areas as compared to more common diseases. To summarize,  
177 the majority of the investigated diseases in our data set are rare genetic and neurologic  
178 conditions with the most extensively explored conditions being CF and sickle cell disease.



179

180 **Intervention type**

181 Next, intervention types across study phases together with sponsors were analyzed (**Table 2**).

182 Compared to ClinicalTrials.gov, where 45.6% (n=135,555) of all registered CTs involve drugs

183 and biologicals as primary intervention type<sup>11</sup>, drug interventions (including small molecules)

184 constituted 78.5% (n=829) of the CTs in our data set, followed by biologicals (13.1%, n=138).

185 In detail, 81.3% (n=257) of phase 2 RD CTs conducted by industry were found to involve

186 drugs, followed by biologicals (14.2%, n=45) and devices (2.2%, n=7). Similarly, drugs and

187 biologicals with 78.7% (n=214) and 5.9% (n=16) respectively, made up the majority of phase

188 2 CTs in the academia/non-profit sector. Notably, academia/non-profit-led trials tended to

189 investigate intervention types beyond drugs or biologicals, such as dietary supplements,

190 devices or procedures. Phase 3 RD CTs were found to be almost exclusively industry-

191 sponsored and investigate drugs (78.4%) or biologicals (20.9%). Academia/non-profit CTs

192 focused on drugs (79.8%), but not on biologicals (1.0%). In summary, the majority of studies

193 investigate drugs with the main sponsor being industry, whereas academia/non-profit-led trials

194 tend to explore a broader range of intervention types.

195

| Intervention Type<br>per phase | Industry           |                                |                               | Academia/Non-Profit |                                   |                               |
|--------------------------------|--------------------|--------------------------------|-------------------------------|---------------------|-----------------------------------|-------------------------------|
|                                | n (% per<br>Phase) | n (% per<br>Intervention Type) | n of CTs in<br>this phase (%) | n (% per<br>Phase)  | n (% per<br>Intervention<br>Type) | n of CTs in<br>this phase (%) |
| <b>Phase 2</b>                 | <b>316 (53.7)</b>  |                                |                               | <b>272 (46.3)</b>   |                                   |                               |
| Behavioral                     | 0 (0.0)            | 0 (0.0)                        | 0 (0.0)                       | 5 (0.9)             | 5 (100.0)                         | 5 (1.8)                       |
| Biological                     | 45 (7.7)           | 45 (73.8)                      | 45 (14.2)                     | 16 (2.7)            | 16 (26.2)                         | 16 (5.9)                      |
| Combination Product            | 1 (0.2)            | 1 (100.0)                      | 1 (0.3)                       | 0 (0.0)             | 0 (0.0)                           | 0 (0.0)                       |
| Device                         | 7 (1.2)            | 7 (53.8)                       | 7 (2.2)                       | 6 (1.0)             | 6 (46.2)                          | 6 (2.2)                       |
| Dietary Supplement             | 1 (0.2)            | 1 (11.1)                       | 1 (0.3)                       | 8 (1.4)             | 8 (88.9)                          | 8 (2.9)                       |
| Drug                           | 257 (43.7)         | 257 (54.6)                     | 257 (81.3)                    | 214 (36.4)          | 214 (45.4)                        | 214 (78.7)                    |
| Genetic                        | 1 (0.2)            | 1 (50.0)                       | 1 (0.3)                       | 1 (0.2)             | 1 (50.0)                          | 1 (0.4)                       |

|                        |                    |            |            |                   |           |           |
|------------------------|--------------------|------------|------------|-------------------|-----------|-----------|
| Other                  | 1 (0.2)            | 1 (11.1)   | 1 (0.3)    | 8 (1.4)           | 8 (88.9)  | 8 (2.9)   |
| Procedure              | 3 (0.5)            | 3 (20.0)   | 3 (0.9)    | 12 (2.0)          | 12 (80.0) | 12 (4.4)  |
| Radiation              | 0 (0.0)            | 0 (0.0)    | 0 (0.0)    | 2 (0.3)           | 2 (100.0) | 2 (0.7)   |
| <b>Phase 2/Phase 3</b> | <b>32 (39.5)</b>   |            |            | <b>49 (60.5)</b>  |           |           |
| Behavioral             | 0 (0.0)            | 0 (0.0)    | 0 (0.0)    | 1 (1.2)           | 1 (100.0) | 1 (2.0)   |
| Biological             | 14 (17.3)          | 14 (87.5)  | 14 (43.8)  | 2 (2.5)           | 2 (12.5)  | 2 (4.1)   |
| Device                 | 1 (1.2)            | 1 (25.0)   | 1 (3.1)    | 3 (3.7)           | 3 (75.0)  | 3 (6.1)   |
| Dietary Supplement     | 0 (0.0)            | 0 (0.0)    | 0 (0.0)    | 4 (4.9)           | 4 (100.0) | 4 (8.2)   |
| Drug                   | 16 (19.8)          | 16 (30.2)  | 16 (50.0)  | 37 (45.7)         | 37 (69.8) | 37 (75.5) |
| Other                  | 1 (1.2)            | 1 (100.0)  | 1 (3.1)    | 0 (0.0)           | 0 (0.0)   | 0 (0.0)   |
| Procedure              | 0 (0.0)            | 0 (0.0)    | 0 (0.0)    | 2 (2.5)           | 2 (100.0) | 2 (4.1)   |
| <b>Phase 3</b>         | <b>287 (74.4)*</b> |            |            | <b>99 (25.6)*</b> |           |           |
| Behavioral             | 0 (0.0)            | 0 (0.0)    | 0 (0.0)    | 2 (0.5)           | 2 (100.0) | 2 (2.0)   |
| Biological             | 60 (15.5)          | 60 (98.4)  | 60 (20.9)  | 1 (0.3)           | 1 (1.6)   | 1 (1.0)   |
| Device                 | 1 (0.3)            | 1 (25.0)   | 1 (0.3)    | 3 (0.8)           | 3 (75.0)  | 3 (3.0)   |
| Dietary Supplement     | 1 (0.3)            | 1 (16.7)   | 1 (0.3)    | 5 (1.3)           | 5 (83.3)  | 5 (5.1)   |
| Drug                   | 225 (58.3)         | 225 (74.0) | 225 (78.4) | 79 (20.5)         | 79 (26.0) | 79 (79.8) |
| Other                  | 0 (0.0)            | 0 (0.0)    | 0 (0.0)    | 5 (1.3)           | 5 (100.0) | 5 (5.1)   |
| Procedure              | 0 (0.0)            | 0 (0.0)    | 0 (0.0)    | 4 (1.0)           | 4 (100.0) | 4 (4.0)   |

196

197 **Table 2.** Intervention Type per Phase and Sponsor for 1055 completed phase 2, 2/3 and 3 CTs

198 registered at ClinicalTrials.gov. One study was removed from the analysis since the sponsor could not  
 199 be assigned unambiguously to any of the two categories.

200

## 201 Study location

202 The selection of investigational sites can be pivotal for enrollment and overall study success  
 203 and their number varies considerably depending on the sponsor. Out of the 1,056 trials in our  
 204 data set, 632 (59.8%) entered at least one study site and, analyzing both sponsor categories  
 205 separately, no significant difference was found. While 58.3% of all 635 CTs run by industry  
 206 entered a study location, it was 62.1% of those run by academia/non-profit out of a total of 420.  
 207 One study could not be allocated to a sponsor and was therefore excluded leaving 1,055 trials

208 for analysis. Although CTs from all around the world can be registered in ClinicalTrials.gov,  
209 we found that 44.3% (n=4,431) of the study sites were located in the U.S.. Here, the sum of  
210 counts by location does not equal the total CT number, as each location indicated by a study is  
211 counted and a single study may be counted more than once. Analyzing the number of sites by  
212 continent, the majority of sites are located in North America (48.5%, n=4,845) and Europe  
213 (33.9%, n=3,387), followed by Asia (11.4%, n=1,141), Central and South America (2.9%,  
214 n=286), Australia and Oceania (2.7%, n=269) and Africa (0.7%, n=72). The countries with the  
215 most study sites were the U.S. with 4,431 sites, Germany with 621 sites, France with 566 sites,  
216 Japan with 429 sites, Canada with 414 sites and the UK with 395 sites as well as Italy and  
217 Spain, with 326 and 251 sites, respectively. Approximately one third of RD CTs were run at a  
218 single site (34.7%, n=219), followed by 14.9% with up to five sites, 12.5% with up to ten sites  
219 and 9.7% with up to 15 sites. 4.6% and 5.4% of the studies had up to 15 and 25 study sites,  
220 respectively, and 1.6% indicated more than 100. The remaining 16.8% were scattered between  
221 25 and 100 study sites. Moreover, industry-led trials significantly increased the number of  
222 study sites with ascending study phase. Accordingly, the mean location number for industry in  
223 phases 2, 2/3 and 3 was 15.0 (median of 7.5), 23.0 (median of 18.0) and 32.7 (median of 23.5),  
224 while for academia the location numbers per phase were 3.1 (median of 1.0), 4.6 (median of  
225 1.0) and 9.6 (median of 1.0). Compared to the entire trial corpus present on ClinicalTrials.gov,  
226 where 40% of the CTs indicated trial sites in the U.S. (35% U.S. only and 5% U.S. and non-  
227 U.S.), we found that RD CTs tend to be more often conducted in the U.S. (44.3%). In summary,  
228 the vast majority of trials entered in ClinicalTrials.gov are conducted in North America and  
229 Europe and despite a correlation between higher numbers of study centers and industry  
230 funding, studies run at only one site are the most common.

231

232 **Participant enrollment**

233 CT patient recruitment is critical and can be especially challenging in RD CTs due to patient  
234 scarceness and dispersion. The enrollment numbers in our data set follow the typical trend  
235 observed in common diseases in that the number of participants increases with progressing  
236 study phase. Participant numbers were heterogeneous, as reflected by considerable standard  
237 deviation values. The median patient recruitment for industry CTs in phases 2, 2/3 and 3 was  
238 40.0 (interquartile range (IQR), 21-76), 77.5 (IQR, 50-227), and 80.5 (IQR, 37-191),  
239 respectively, vs. 26.0 (IQR, 12-47), 35.0 (IQR, 20-88) and 60.0 (IQR, 23-110) for  
240 academia/non-profit CTs. This enrollment difference between sponsor types was significant  
241 ( $p < 0.05$ ) in phases 2 and 2/3. The mean enrollment was approximately 96% (industry) and 83%  
242 (academia/non-profit) higher than the median. Of the 73,071 participants enrolled in industry-  
243 funded trials, 59.4% had been recruited for phase 3 CTs, followed by 33.6% for phase 2 CTs,  
244 and 6.9% for phase 2/3 CTs. Academia/non-profit enrolled 44.0% of a total of 24,959  
245 participants in phase 3 CTs, 40.7% in phase 2 CTs, and 15.3% in phase 2/3 CTs. Analyzing  
246 gender eligibility in RD CTs we found that the majority of the studies, 89.3%, admitted  
247 participants of any sex, while 7.1% and 3.6% of RD CTs enrolled only male or female subjects,  
248 respectively. In summary, industry-led trials in all phases enrolled consistently more patients  
249 than academia/non-profit-funded trials, with notable variability as reflected by the standard  
250 deviation in enrollment.

251

### 252 **Participant Age**

253 A RD can affect anyone irrespective of age, but at least half of RDs manifest themselves in  
254 early childhood. To determine if this is reflected in RD CTs, the participant age was assessed.  
255 Therefore, the entries for the ClinicalTrials.gov categories “participant age”, “participant  
256 minimum age” and “participant maximum age” were retrieved and summarized in **Table 3**. A  
257 minimum age for participants was entered for 92.9% ( $n=981$ ). Of the CTs showing a minimum

258 age, 88.2% allowed patients under 18 years to be enrolled. In contrast, only 56.3% of the studies  
259 indicated an upper age limit for participants. Of those, 41.6% indicated an extended age of  
260 eligibility above 65 years and a notable fraction (15.2%) of trials set the maximum age between  
261 11 and 18 years. While extracting the minimum and maximum age limits was fairly  
262 straightforward, the analysis of the participant age, filled out by 96.8% of the studies, proved  
263 complicated due to the lack of uniformity of the information entered. After manual  
264 categorization into age groups, we were able to visualize the data (**Fig. 2**). Even though around  
265 three quarters of the studies set the upper age limit to more than 60 years, numerous studies put  
266 their focus on a younger population, mirrored by the high proportion of studies indicating a  
267 minimum participant age below 18.  
268

| Participant Minimum Age | n (%)            | Participant Maximum Age | n (%)            |
|-------------------------|------------------|-------------------------|------------------|
| < 1 year                | 24 (2.5)         | < 1 year                | 15 (2.5)         |
| 1-10 years              | 204 (20.8)       | 1-10 years              | 31 (5.2)         |
| 11-18 years             | 637 (64.9)       | 11-18 years             | 90 (15.2)        |
| 19-35 years             | 66 (6.7)         | 19-35 years             | 47 (7.9)         |
| 36-65 years             | 50 (5.1)         | 36-65 years             | 164 (27.6)       |
| 65<                     | 0 (0.0)          | 65<                     | 247 (41.6)       |
| <b>Total</b>            | <b>981 (100)</b> | <b>Total</b>            | <b>594 (100)</b> |

269 **Table 3.** Participant minimum and maximum age as indicated by RD CTs in our data set (n=1056).

270

### 271 **Study duration**

272 Another aspect of CTs is study duration, as calculated in this analysis from the study start to  
273 the study completion date. We found that phase 2 studies conducted by industry were, with a  
274 median duration of 22 months (IQR, 14-33), significantly ( $p<0.0001$ ) shorter than their  
275 academia/non-profit-led equivalent, with a median duration of 33 months (IQR, 22-47)(**Fig.**  
276 **3**). This trend could be similarly observed in phase 3 CTs, with industry conducting shorter

277 studies with a median of 27 months (IQR, 18-41) versus 34.5 months (IQR, 19-52) for  
278 academia/non-profit CTs ( $p<0.05$ ). In contrast, the study duration did not differ significantly  
279 in phase 2/3 CTs between industry and academia/non-profit with a median of 29 (IQR, 21-37)  
280 and 31 (IQR, 18-48), respectively. In summary, industry-funded phase 2 and 3 RD CTs are of  
281 a shorter duration than studies led by academia/non-profit.

282

### 283 **Result reporting among rare disease clinical trials**

284 In 2007, the FDAAA was introduced requiring the posting of results for eligible studies on  
285 ClinicalTrials.gov within twelve months after study completion (FDAAA section 801). A CT  
286 qualifies as eligible or applicable to the FDAAA if the drug, biological or device under  
287 investigation has been manufactured in the U.S. or its territories, or if the CT has at least one  
288 study site in the U.S. or its territories. To examine result reporting, a second data set of ( $n=725$   
289 CTs) consisting of 55.9% phase 2, 7.6% phase 2/3, and 36.6% phase 3 CTs was generated  
290 (further information provided in **Supplementary table 1**). Overall, 44.8% ( $n=325$ ) trials had  
291 entered results while 55.2% ( $n=400$ ) had not. Of those that failed to report results, 65.8% were  
292 phase 2, 9.8% were phase 2/3, and 24.5% were phase 3 CTs. Industry reported consistently  
293 more results over all years (2008-2015) with a total of 56.3% ( $n=243$ ) reporting RD CTs.  
294 Strikingly, only 28.0% ( $n=82$ ) of studies conducted by academia/non-profit did likewise. To  
295 explore if sponsors in the non-reporting data set were meeting their obligations under the  
296 regulations, we extracted the RD CTs which were identified as including at least one U.S. site  
297 ( $n=134$ ) or using a drug manufactured within the U.S. ( $n=1$ ). For the remainder of the studies  
298 ( $n=265$ ) determining if the FDAAA was applicable could not be easily concluded from the  
299 information included in ClinicalTrials.gov, thus a random sample of approximately 25%  
300 ( $n=67$ ) were examined manually. The majority ( $n=53$ , 79.1%) of the studies in this sample were  
301 not applicable to the FDAAA, while four (6%) CTs were identified as applicable. The

302 remaining ten (14.9%) studies in this sample did not provide enough information for a clear  
303 categorization. We found that one of the studies that was not applicable displayed the status  
304 “results submitted” with no results entered in the respective entry field meaning that the results  
305 might currently be under evaluation. Extrapolating the manually extracted data set of 67 studies  
306 to the results of the overall number of non-reporting trials, we estimated that 20.8% of the  
307 included 725 CTs failed to report results although required by U.S. law. Thereof, 105 CTs  
308 (24.3%) are industry-funded and 46 CTs (15.7%) academia/non-profit-funded studies. Adding  
309 trials with unclear applicability (0.9% industry- and 12.3% academia/non-profit-led CTs), the  
310 overall proportion of result non-reporting CTs, although (potentially) legally required,  
311 increases to 25.2% and 28.0% for studies initiated by industry and academia/non-profit,  
312 respectively. In summary, more than half of the industry-funded and roughly one third of  
313 academia/non-profit-funded RD CTs report results online after study completion. Of those that  
314 unambiguously fall under the regulation of the FDAAA, CTs sponsored by academia/non-  
315 profit enter results more often than industry-led CTs, with the latter posting more results online  
316 on a voluntary basis. However, including also potentially applicable CTs, result reporting  
317 practices do not differ between sponsors.

318

## 319 **DISCUSSION**

320 We conducted a landscape analysis of completed phase 2, 2/3 and 3 RD CTs registered in the  
321 ClinicalTrials.gov database, including CTs from all disease areas except oncology and  
322 infectious diseases. RD CTs were shown to be mostly sponsored by industry, which is in line  
323 with previous findings in more common diseases<sup>12</sup>. Academia/non-profit CTs prevail in phase  
324 2/3 possibly because CTs in this phase often explore already approved drugs in new  
325 populations, or for extended indications. This falls in line with a previous observation of  
326 academia-led trials peaking predominantly before phase 3<sup>13</sup>. The present industry dominance

327 in phase 3 CTs, which often are needed for regulatory approval, can be linked to those trials  
328 characteristically being large and of longer duration rendering them costly. Similar to previous  
329 reports, drug interventions represent the most frequent type of intervention in our data set<sup>14</sup>.  
330 Unsurprisingly, industry focused on drugs and biologicals in all phases, with biologicals more  
331 common in phase 2/3. Academia/non-profit, although similarly focused on drugs, explored a  
332 broader array of interventions, including devices and dietary supplements. That might be  
333 partially due to the challenges posed by the nature and diversity of the dietary supplements  
334 branch and its globally varying regulations among different jurisdictions or governmental  
335 dominance in this field<sup>15</sup>. The strong presence of academia/non-profit sponsors in CTs around  
336 biologicals and drugs could be due to research done on approved drugs aiming to extend their  
337 scope towards new applications or patient groups in RDs. As previously reviewed<sup>16</sup>,  
338 pharmaceutical companies and academics are entering into collaborations to repurpose  
339 approved or discontinued drugs for other indications, including RDs. This may explain the  
340 increased numbers of non-industry sponsored phase 2/3 trials. Overall, comparing our data with  
341 similar data in ClinicalTrials.gov, no differences between our RD data set and the CTs in more  
342 common diseases could be detected and intervention types employed in RD research, with the  
343 largest group being phase 2 CTs investigating drugs conducted by industry, reflect the common  
344 practice in general clinical research<sup>17</sup>.

345 Most RD CTs are genetic or neurologic diseases. The high prevalence of genetic CTs in the  
346 RD data set is to be expected, as the majority of RDs are thought to be genetic in origin<sup>18</sup>.  
347 Among these, CF is the most researched disease, representing also the most common genetic  
348 disease in Caucasian children counting 70,000 cases worldwide. This substantial number of  
349 patients, paired with early screening policies and a molecular understanding of the disease  
350 facilitates the setup of CT and thereby therapy development<sup>19-20</sup>, leading pharmaceutical  
351 companies to conduct studies in this field<sup>21</sup>. Similar reasons might apply for neurologic



352 disorders, the second focus of CTs in our data set, which occur relatively frequently in the  
353 pediatric population<sup>22</sup>. These observations are in line with what can be found for common  
354 diseases present in ClinicalTrials.gov, where nervous system disorders are the most researched  
355 disease area, followed by neoplasms and general pathologies. In contrast, digestive system  
356 diseases, heart and blood diseases, and behaviors and mental disorders were highly represented  
357 in ClinicalTrials.gov, but not in our RD data set. Therefore, although rare diseases are  
358 numerous, the vast majority of clinical trials focus on a few disease categories and conditions,  
359 such as CF. Furthermore, we found Huntington disease (HD) representing the top disease in  
360 rare eye disorders, followed by uveitis. Although HD is not primarily an eye disorder, a  
361 possible explanation for this finding could be a common endpoint in this disease (Unified  
362 Huntington's Disease Rating Scale), including ocular assessments causing its misclassification  
363 as eye disorder. This example highlights the difficulties that can occur when analyzing data  
364 from Clinicaltrials.gov that has not been curated or reviewed critically.

365 In line with a recently published study<sup>23</sup>, we identified North America and Europe as the  
366 regions and the U.S. and Germany as the countries with the most study locations. The high  
367 proportion of U.S.-led CTs could be explained by the strong presence of the pharma industry  
368 compared to other countries with the ensuing availability of financial and infrastructural  
369 resources as well as the strong presence of active patient associations and foundations that play  
370 a key role in advancing research<sup>21</sup>. Japan, Australia, Argentina and South Africa were the  
371 countries with most CTs in Asia, the Oceania region, Middle and South America and Africa,  
372 respectively. However, 40.2% of CTs did not report a location, biasing the data and its  
373 interpretation. In accordance with a previous report analyzing the International Clinical Trial  
374 Registry Platform (ICTRP), we found Japan to be the country with the most CT sites in Asia<sup>23</sup>.  
375 While the mentioned report attributes the shift away from "traditional" CT sites in Western  
376 countries to lower study costs in other countries, the study location for RD CTs could be more

377 influenced by patient prevalence, the availability of specialized care centers and specific  
378 legislation fostering RD research<sup>24-25</sup>.

379 Considering the general scarceness of patients and experts/specialized care centers in RDs, it  
380 is not surprising that half of the trials indicate at most five sites. In contrast, almost two thirds  
381 of the trials indicated more than one study site, pointing towards the implementation of more,  
382 but smaller study sites in RD research. Support for this hypothesis might be provided by Bell  
383 and Smith et al. who, looking at interventional CTs, found that RD CTs have less study sites  
384 compared to non-RDs<sup>26</sup>. The correlation we found between industry-funded CTs and an  
385 increased number of study sites could be linked to the different financial support received  
386 compared to academia/non-profit.

387 Although phase 2 CTs prevail in our data set, most participants were enrolled in phase 3 CTs,  
388 with the majority enrolled in industry sponsored CTs. A study analyzing common disease CTs  
389 of all phases reported an overall enrollment rate below 100 participants for 62% of studies,  
390 which was the same percentage we observed in phase 3 CTs in ClinicalTrials.gov. Examining  
391 phase 2 and 2/3 RD CTs, the proportion of studies enrolling 100 or less patients rose to 87.8%  
392 and 72.8%, respectively. Comparing our data set to the aforementioned study based on the  
393 respective median enrollment, we found comparable accrual numbers between RD CTs overall  
394 and therein described oncology trials, whilst mental health and cardiovascular CTs were higher  
395 at 85 and 100, respectively. It is somewhat surprising that the number of patients in RD CTs  
396 and non-RD CTs are similar, as we expected RD CTs to enroll fewer patients as previously  
397 indicated in a study comparing rare with non-rare disease CTs<sup>26</sup>. While this study describes  
398 mostly early phase CTs with fewer participants, most of the patients in our data set were  
399 enrolled in phase 3 CTs. Additionally, the limited power of small studies to show significant  
400 clinical efficacy, might be avoided by study sponsors resulting in higher accrual numbers.  
401 Reasons for less participant accrual in non-RD CTs could be competing trials targeting similar

402 participant populations or even an increased focus on small sub-populations within a larger  
403 disease area. This indicates that CTs in RDs and more common diseases may be becoming  
404 more similar and both may have issues with recruitment of sufficient numbers of patients to  
405 draw firm conclusions. Notably, we observed great heterogeneity between trials enrolling few  
406 patients, sometimes in single digits and trials enrolling hundreds or thousands, a phenomenon  
407 that has also been previously reported<sup>17</sup>.

408 Gender disparity in biomedical research, which may insert a bias in clinical findings and  
409 therefore may lead to a disadvantage in clinical practice for women, is recognized and has been  
410 described before<sup>17,27,28,29</sup>. Although we did not observe a significant gender bias in RD CTs,  
411 we found that out of all studies recruiting only patients from a specific gender, twice as many  
412 recruited only male patients than female, which could be partially attributed to the  
413 aforementioned historic and general underrepresentation of women in CTs.

414 The age of eligibility for study subjects is crucial in many diseases, often influencing the overall  
415 study success. The majority of RDs are thought to be genetic disorders, which present already  
416 in early childhood or adolescence, thereby necessitating an early therapy start<sup>30-32</sup>.  
417 Consequently, RD CTs had a wide age range with the majority including pediatric patients,  
418 unlike in more common diseases that can occur throughout life<sup>17,26</sup>.

419 CT participation is often associated with great efforts by (pediatric) patients and their family  
420 members, thus the study duration can have a major impact on participant compliance and  
421 retention in the study. We found a direct correlation between the study duration and study  
422 phase, which is in line with common clinical research practices such as monitoring procedures,  
423 larger sample sizes, time to analyze larger data sets including side effects etc. in phase 3 studies.  
424 The fact that industry-funded CTs are significantly shorter than academia-/non-profit-led CTs  
425 could be attributed to the former usually having more resources, which allows for more sites,

426 thereby increasing patient recruitment velocity. Comparing RD CTs to all phases of nephrology  
427 or cardiology studies, no significant difference could be detected in the overall study duration<sup>14</sup>.  
428 Clinical research is essential for clinical decision making and providing the best standard of  
429 care for patients. Since the enactment of the FDAAA in 2007, CT result reporting is no longer  
430 only ethically desirable, but also mandatory within twelve months upon trial completion.  
431 However, this rule only applies to studies investigating a drug, biological or device  
432 manufactured in the U.S. or studies indicating at least one study site in the U.S. or within its  
433 territories<sup>6</sup>. Our analysis of studies completed before 2015 showed that after at least two years  
434 following completion less than half of all analyzed RD CTs posted results on ClinicalTrial.gov.  
435 A previous study on result reporting under FDAAA regulations found that only 22% of the  
436 CTs report results timely, with only 10% doing so on a voluntary basis. Additionally, the  
437 authors stated that result reporting occurs in only 40% of industry-funded and 9% not solely  
438 industry-funded CTs with phase 3 studies being the most frequently reported CTs<sup>7</sup>. Despite  
439 opposition of the FDA<sup>33</sup>, an unofficial analysis conducted by the U.S. National Institutes of  
440 Health (NIH) confirms that industry performs better than public sponsors (NIH and NIH-  
441 funded), when it comes to timely result reporting, with 52% vs. 35%, respectively<sup>34</sup>. A recent  
442 study analyzing the availability of phase 3 and 4 RD CT results on ClinicalTrial.gov found that  
443 68% of the trials affected by the FDAAA reported results<sup>35</sup>. In our data set, phase 2 trials  
444 account for roughly two thirds of the non-reporting CTs we identified. Studies registered with  
445 the EU Clinical Trials Register (EUCTR), which requires result disclosure within 12 months  
446 after trial completion, performed similarly, with only half of the applicable CTs posting  
447 results<sup>36</sup>. This recent report also found that CT result reporting was linked to later study phases  
448 and industry funding. Drawing a final conclusion on the result reporting rate between the two  
449 sponsor categories in our data set is not obvious due to the incompleteness of the information  
450 provided online. Considering only studies that clearly apply to the FDAAA, industry funding

451 is shown to be associated with a higher degree of non-reporting in RD CTs. However, including  
452 potentially applicable CTs, academia/non-profit and industry fall abreast. This importantly  
453 highlights the need for complete information in order for external parties to be able to draw  
454 transparent conclusions. Generally, industry trials in RDs were associated with better overall  
455 result posting even when not required by the FDAAA, potentially due to more strictly regulated  
456 and overseen follow-up processes and the fact that industry-funded trials tend to be larger and  
457 larger studies are more likely to be published<sup>37</sup>.

458 The finding that RD CTs adhere more strictly to the FDAAA than CTs overall might be due to  
459 ethical obligations towards these patients and the high value of clinical data from a CT, which  
460 may be the only one performed in a patient population. RD CTs also include many pediatric  
461 patients and pediatric CTs were found more likely to be completed<sup>38</sup>. Regardless of the reasons,  
462 it is encouraging to note that RD CTs are reported at a higher rate than other CTs. Ultimately,  
463 CTs need to overcome the widely recognized and general deficit of consistent and transparent  
464 data sharing practices, not only to improve patient care, but also to value the participants who  
465 help advancing science and future patients.

466

## 467 **CONCLUSION**

468 This study provides insights into the landscape of RD CTs. RD clinical research was found to  
469 be rather industry-funded and focused on treatments involving drugs or biologicals, with many  
470 studies including a relatively small number of participants and patients starting from very early  
471 in life. Generally, industry funding was linked to larger trials, including higher enrollment and  
472 more study locations, but slightly shorter study duration compared to academia/non-profit  
473 trials. Finally, CTs in rare diseases make results more often publicly available than what has  
474 been previously reported for all studies entered in ClinicalTrial.gov, but improvements are still  
475 needed to make all data readily available for the public.

476

477 **Limitations**

478 There are some limitations in this study to be taken into consideration. First, ClinicalTrials.gov  
479 does not cover all trials conducted worldwide. However, there is a reported 80% overlap  
480 between ClinicalTrials.gov and the WHO ICTRP portal<sup>18</sup>. Secondly, there is no single standard  
481 ontology for the description of clinical research and, despite extensive manual data curation  
482 efforts, the data set may still contain misclassified studies. Conversely, some CTs may have  
483 been excluded from our study, due to the disease under study not conforming to the ORDO  
484 naming convention. Efforts were made to identify, correct or remove erroneous or ambiguous  
485 as well as carelessly entered data prior to analysis, however, an element of uncertainty remains.  
486 Additionally, a notable fraction of studies may provide divergent information on  
487 ClinicalTrials.gov and EUCTR, making comparisons difficult<sup>39</sup>. Although the FDAAA was  
488 introduced to increase transparency, this legislation came with certain limitations; For example,  
489 its applicability to studies with at least one study site or an item manufactured in the U.S. or  
490 U.S. territories. It is, however, not evident which studies are applicable and which ones are  
491 exempt. Even though we attempted to address this limitation by examining a random sample  
492 of 25% of the trials manually, errors may still be present. In this study, early proof-of-concept  
493 trials, which can be impactful on the scientific community, e.g. in order to avoid duplicity of  
494 resources, are not reviewed. Finally, this study represents a snapshot of RD CTs as they were  
495 entered in March 2018 and some study details may have been added after we retrieved the data.

496

497 **REFERENCES**

498

- 499 1. de Vruet R, Baekelandt ERF, de Haan JMH. Priority Medicines for Europe and the  
500 World “A Public Health Approach to Innovation” Update on 2004 Background Paper

- 501 Background Paper 6.19 Rare Diseases. 2013.
- 502 2. Boycott KM, Vanstone MR, Bulman DE, MacKenzie AE. Rare-disease genetics in the  
503 era of next-generation sequencing: discovery to translation. *Nat Rev Genet.* 2013;  
504 3;14:681.
- 505 3. Global Genes. RARE Facts. 2018. <https://globalgenes.org/rare-facts/>. Accessed 6 Nov  
506 2018.
- 507 4. Food and Drug Administration. Orphan Drug Act - Relevant Excerpts. 2013.  
508 [https://www.fda.gov/industry/designating-orphan-product-drugs-and-biological-](https://www.fda.gov/industry/designating-orphan-product-drugs-and-biological-products/orphan-drug-act-relevant-excerpts)  
509 [products/orphan-drug-act-relevant-excerpts](https://www.fda.gov/industry/designating-orphan-product-drugs-and-biological-products/orphan-drug-act-relevant-excerpts). Accessed 7 Nov 2018.
- 510 5. Food and Drug Administration. Orphan Drug Designations and Approvals. 1983.  
511 <https://www.accessdata.fda.gov/scripts/opdlisting/oopd/>. Accessed 7 Nov 2018.
- 512 6. U.S. Public Law 110-85; Section 801. Food and Drug Administration Amendments  
513 Act (FDAAA) of 2007. 2007.
- 514 7. Prayle AP, Hurley MN, Smyth AR. Compliance with mandatory reporting of clinical  
515 trial results on ClinicalTrials.gov: cross sectional study. *BMJ.* 2012;344:d7373.
- 516 8. Riveros C, Dechartres A, Perrodeau E, Haneef R, Boutron I, Ravaud P. Timing and  
517 Completeness of Trial Results Posted at ClinicalTrials.gov and Published in Journals.  
518 *PLOS Med.* 2013;10:e1001566.
- 519 9. Powell-Smith A, Goldacre B. The TrialsTracker: Automated ongoing monitoring of  
520 failure to share clinical trial results by all major companies and research institutions.  
521 *F1000Research.* 2016;5:2629.
- 522 10. U.S. National Library of Medicine. ClinicalTrials.gov - Glossary. 2018.  
523 <https://clinicaltrials.gov/ct2/about-studies/glossary>. Accessed 11 Nov 2018.
- 524 11. U.S. National Library of Medicine. ClinicalTrials.gov - Trends. 2018.  
525 <https://clinicaltrials.gov/ct2/resources/trends>. Accessed 11 Nov 2018.

- 526 12. Anderson ML, Chiswell K, Peterson ED, Tasneem A, Topping J, Califf RM.  
527 Compliance with Results Reporting at ClinicalTrials.gov. *N Engl J Med.* 2015;  
528 11;372:1031–9.
- 529 13. Chen R, Desai NR, Ross JS, Zhang W, Chau KH, Wayda B, et al. Publication and  
530 reporting of clinical trial results: cross sectional analysis across academic medical  
531 centers. *BMJ.* 2016;352:i637
- 532 14. Inrig JK, Califf RM, Tasneem A, Vegunta RK, Molina C, Stanifer JW, et al. The  
533 landscape of clinical trials in nephrology: a systematic review of Clinicaltrials.gov.  
534 *Am J Kidney Dis.* 2014;63:771–80.
- 535 15. Dwyer JT, Coates PM, Smith MJ. Dietary Supplements: Regulatory Challenges and  
536 Research Resources. *Nutrients.* 2018;10:41.
- 537 16. Pushpakom S, Iorio F, Eyers PA, Escott KJ, Hopper S, Wells A, et al. Drug  
538 repurposing: progress, challenges and recommendations. *Nat Rev Drug Discov.*  
539 2018;18:41.
- 540 17. Califf RM, Zarin DA, Kramer JM, Sherman RE, Aberle LH, Tasneem A.  
541 Characteristics of Clinical Trials Registered in ClinicalTrials.gov, 2007-2010. *JAMA.*  
542 2012;307:1838–47.
- 543 18. EURORDIS Rare Diseases Europe. About Rare Diseases. 2015.  
544 <https://www.eurordis.org/about-rare-diseases>. Accessed 6 Nov 2018.
- 545 19. Mayer-Hamblett N, Boyle M, VanDevanter D. Advancing clinical development  
546 pathways for new CFTR modulators in cystic fibrosis. *Thorax.* 2016;71:454-461.
- 547 20. Bell SC, De Boeck K, Amaral MD. New pharmacological approaches for cystic  
548 fibrosis: Promises, progress, pitfalls. *Pharmacol Ther.* 2015;145:19–34.
- 549 21. Rowe SM, Borowitz DS, Burns JL, Clancy JP, Donaldson SH, Retsch-Bogart G, et al.  
550 Progress in cystic fibrosis and the CF Therapeutics Development Network. *Thorax.*



- 551 2012;67:882–90.
- 552 22. Huang Y, Yu S, Wu Z, Tang B. Genetics of hereditary neurological disorders in  
553 children. *Transl Pediatr.* 2014;3:108–19.
- 554 23. Jeong S, Sohn M, Kim JH, Ko M, Seo H-W, Song Y-K, et al. Current globalization of  
555 drug interventional clinical trials: characteristics and associated factors, 2011-2013.  
556 *Trials.* 2017;18:288.
- 557 24. Aymé S. RC. 2012 Report on the State of the Art of Rare Disease Activities in Europe  
558 of the European Union Committee of Experts on Rare Diseases.
- 559 25. Tsukamoto K, Carroll KA, Onishi T, Matsumaru N, Brasseur D, Nakamura H.  
560 Improvement of Pediatric Drug Development: Regulatory and Practical Frameworks.  
561 *Clin Ther.* 2016;38:574–81.
- 562 26. Bell SA, Tudur Smith C. A comparison of interventional clinical trials in rare versus  
563 non-rare diseases: an analysis of ClinicalTrials.gov. *Orphanet J Rare Dis.* 2014 Nov  
564 26;9:170.
- 565 27. Hamberg K. Gender bias in medicine. *Womens Health (Lond.).* 2008;4:237–43.
- 566 28. Ramasubbu K, Gurm H, Litaker D. Gender Bias in Clinical Trials: Do Double  
567 Standards Still Apply? *J Womens Health Gend Based Med.* 2001;10:757–64.
- 568 29. Choi EK, Kim MJ, Lim NK, Park HY. Review of the Registration in the Clinical  
569 Research Information Service. *J Korean Med Sci.* 2016;31:1–8.
- 570 30. Jimenez-Sanchez G, Childs B, Valle D. Human disease genes. *Nature.* 2001;409:853–  
571 5.
- 572 31. McClellan J, King M-C. Genetic Heterogeneity in Human Disease. *Cell.*  
573 2010;141:210–7.
- 574 32. Yum K, Wang ET, Kalsotra A. Myotonic dystrophy: disease repeat range, penetrance,  
575 age of onset, and relationship between repeat size and phenotypes. *Curr Opin Genet*

- 576 Dev. 2017;44:30–7.
- 577 33. Hawkes N. FDA disagrees with BMJ study that found clinical trials were not being  
578 reported. *BMJ*. 2012;344:e3277.
- 579 34. Marin Dos Santos DH, Atallah ÁN. FDAAA legislation is working, but  
580 methodological flaws undermine the reliability of clinical trials: a cross-sectional  
581 study. *PeerJ*. 2015;3:e1015.
- 582 35. Dechartres A, Riveros C, Harroch M, Faber T, Ravaud P. Characteristics and Public  
583 Availability of Results of Clinical Trials on Rare Diseases Registered at  
584 *Clinicaltrials.gov*. *JAMA Intern Med*. 2016;176:556–8.
- 585 36. Goldacre B, DeVito NJ, Heneghan C, Irving F, Bacon S, Fleminger J, et al.  
586 Compliance with requirement to report results on the EU Clinical Trials Register:  
587 cohort study and web resource. *BMJ*. 2018;362:k3218.
- 588 37. Brænd AM, Straand J, Jakobsen RB, Klovning A. Publication and non-publication of  
589 drug trial results: a 10-year cohort of trials in Norwegian general practice. *BMJ Open*.  
590 2016;6:e010535.
- 591 38. Dufetelle E, 't Jong GW, Kaguelidou F. Randomized controlled trials in pediatric  
592 *Í*patients had higher completion rates than adult trials: a cross-sectional study. *J Clin*  
593 *Epidemiol*. 2018;100:53–60.
- 594 39. Fleminger J, Goldacre B. Prevalence of clinical trial status discrepancies: A cross-  
595 sectional study of 10,492 trials registered on both *ClinicalTrials.gov* and the European  
596 Union Clinical Trials Register. *PLoS One*. 2018;13:e0193088.

597

598 **FIGURE LEGENDS**

599

600 **Figure 1.** *Flowchart showing the data set development including the applied filtering steps to*  
601 *select the data sets for analysis. The first data set comprising 1,056 CTs conducted between*  
602 *2008 and 2015 is used for the analysis of characteristics of RD CTs. The second data set*  
603 *serves to investigate result publication practices among RD CTs.*

604

605 **Figure 2.** *Graphic representation of age restrictions for participants of the RD CTs in our*  
606 *data set. Of the total of 1,056 CTs that were analyzed, 1,022 entered age specifications.*

607

608 **Figure 3.** *Comparison of study duration in months between industry- and academia/non-*  
609 *profit-sponsored RD CTs. This analysis is based on the data set comprising 1,056 studies.*

610 **DECLARATIONS**

611

612 **Ethics approval and consent to participate**

613 Not applicable.

614

615 **Consent for publication**

616 Not applicable.

617

618 **Availability of data and materials**

619 The general datasets generated and analyzed during the current study are available in the

620 ClinicalTrials.gov repository, <https://clinicaltrials.gov/>. Moreover, the specific datasets used

621 and analyzed during the current study are available from Timothy J. Seabrook

622 ([timothy\\_j.seabrook@roche.com](mailto:timothy_j.seabrook@roche.com)) on reasonable request.

623

624 **Competing interests**

625 NKM was employed at F. Hoffmann-La Roche Ltd at the time of study conception, data

626 collection and analysis. JG, RRE, and TJS are employees of and hold shares in F. Hoffmann-

627 La Roche Ltd. We attest that we herein have disclosed any and all financial or other

628 relationships that could be construed as a conflict of interest and that all sources of financial

629 support for this study have been disclosed.

630

631 **Funding**

632 This research was supported by F. Hoffmann-La Roche Ltd. The funding body was not part

633 of the study design, data collection, analysis, and interpretation, or in writing the manuscript.

634

635 **Authors' contributions**

636 The study was conceived by JG, RRE, and TJS. Data acquisition, curation and analysis were  
637 performed by NKM. The results were interpreted by all authors. The manuscript was  
638 compiled by NKM and revised by JG, RRE, and TJS. All authors read and approved the final  
639 manuscript.

640

641 **Acknowledgements**

642 We would like to thank Dr. Winnie Yeung for advice and assistance with the statistical analysis.

643

644 **Footnotes**

645 Not applicable.
